# Supplementary material for: Application of the anatomical fiducials framework to a clinical dataset of patients with Parkinson’s disease
Source: PubMed Central journal article supplement (PMC8741686; doi:10.1007/s00429-021-02408-3), 2021-10-23
Supplement: 429_2021_2408_MOESM3_ESM.pdf [file 429_2021_2408_MOESM3_ESM.pdf]

| Fiducial    | Fiducial Name                  | Real-World Linear AFRE (mm) | Real-World Non-linear AFRE (mm) | Consensus Linear AFRE (mm) | Consensus Non-linear AFRE (mm) |
|-------------|--------------------------------|-----------------------------|---------------------------------|----------------------------|--------------------------------|
| 1*†         | AC                             | 2.39 ± 1.34                 | 1.11 ± 1.06                     | 2.17 ± 1.20                | 0.78 ± 0.59                    |
| 2           | PC                             | 2.43 ± 1.12                 | 2.05 ± 1.27                     | 2.34 ± 1.08                | 1.95 ± 1.25                    |
| 3           | Infracollicular sulcus         | 2.60 ± 1.49                 | 2.12 ± 1.56                     | 2.30 ± 1.30                | 1.69 ± 1.32                    |
| 4*          | PMJ                            | 4.49 ± 1.79                 | 2.82 ± 1.36                     | 4.40 ± 1.63                | 2.63 ± 1.16                    |
| 5*†         | Superior interpeduncular fossa | 2.61 ± 1.10                 | 2.06 ± 1.12                     | 2.12 ± 0.88                | 1.44 ± 0.89                    |
| 6           | R superior LMS                 | 2.80 ± 1.36                 | 3.10 ± 1.50                     | 2.37 ± 0.85                | 2.66 ± 1.20                    |
| 7           | L superior LMS                 | 2.82 ± 1.43                 | 3.21 ± 1.70                     | 2.30 ± 0.95                | 2.76 ± 1.40                    |
| 8†          | R inferior LMS                 | 3.11 ± 1.54                 | 2.86 ± 1.65                     | 2.30 ± 1.05                | 1.89 ± 1.04                    |
| 9†          | L inferior LMS                 | 3.36 ± 1.54                 | 3.01 ± 1.82                     | 2.56 ± 1.19                | 2.20 ± 1.15                    |
| 10          | Culmen                         | 3.83 ± 1.74                 | 4.32 ± 1.98                     | 3.21 ± 1.66                | 3.76 ± 1.74                    |
| 11          | Intermammillary sulcus         | 2.68 ± 1.51                 | 2.05 ± 1.09                     | 2.56 ± 1.43                | 1.86 ± 1.03                    |
| 12          | R MB                           | 2.83 ± 1.53                 | 2.02 ± 1.05                     | 2.68 ± 1.43                | 1.80 ± 0.97                    |
| 13          | L MB                           | 2.89 ± 1.55                 | 2.14 ± 1.11                     | 2.74 ± 1.45                | 1.95 ± 0.99                    |
| 14          | Pineal gland                   | 2.88 ± 1.33                 | 3.45 ± 1.74                     | 2.33 ± 1.12                | 3.12 ± 1.28                    |
| 15*         | R LV at AC                     | 5.48 ± 3.59                 | 3.36 ± 3.28                     | 4.93 ± 2.27                | 2.67 ± 1.67                    |
| 16*         | L LV at AC                     | 5.71 ± 3.64                 | 3.16 ± 3.49                     | 4.97 ± 2.54                | 2.51 ± 1.85                    |
| 17*         | R LV at PC                     | 4.72 ± 2.71                 | 3.21 ± 2.47                     | 4.23 ± 2.23                | 2.69 ± 1.91                    |
| 18*         | L LV at PC                     | 4.86 ± 2.63                 | 2.96 ± 2.10                     | 4.49 ± 2.56                | 2.49 ± 1.93                    |
| 19*         | Genu of CC                     | 3.81 ± 1.90                 | 2.51 ± 1.35                     | 3.50 ± 1.86                | 2.25 ± 1.06                    |
| 20          | Splenium                       | 3.17 ± 1.67                 | 3.39 ± 1.13                     | 2.80 ± 1.46                | 3.25 ± 0.84                    |
| 21*         | R AL temporal horn             | 4.43 ± 1.53                 | 2.60 ± 1.72                     | 3.89 ± 1.45                | 1.92 ± 1.09                    |
| 22*         | L AL temporal horn             | 5.09 ± 2.00                 | 3.26 ± 2.38                     | 4.48 ± 1.71                | 2.39 ± 1.74                    |
| 23          | R superior AM temporal horn    | 4.24 ± 2.27                 | 4.66 ± 2.17                     | 3.86 ± 1.64                | 4.42 ± 1.53                    |
| 24          | L superior AM temporal horn    | 5.30 ± 2.67                 | 5.14 ± 2.24                     | 4.96 ± 1.96                | 4.82 ± 1.63                    |
| 25*         | R inferior AM temporal horn    | 5.94 ± 2.92                 | 4.41 ± 2.71                     | 5.26 ± 1.96                | 3.27 ± 1.71                    |
| 26          | L inferior AM temporal horn    | 6.28 ± 3.39                 | 4.81 ± 3.30                     | 5.70 ± 2.04                | 3.84 ± 2.07                    |
| 27*         | R indusium griseum origin      | 4.50 ± 1.79                 | 3.50 ± 1.91                     | 3.95 ± 1.47                | 2.82 ± 1.49                    |
| 28*         | L indusium griseum origin      | 5.35 ± 2.15                 | 4.20 ± 1.80                     | 4.95 ± 1.69                | 3.64 ± 1.33                    |
| 29          | R ventral occipital horn       | 7.43 ± 2.89                 | 6.81 ± 2.94                     | 6.99 ± 2.83                | 6.54 ± 2.42                    |
| 30          | L ventral occipital horn       | 7.42 ± 3.18                 | 7.36 ± 3.41                     | 6.89 ± 3.25                | 6.86 ± 3.48                    |
| 31*†        | R olfactory sulcal fundus      | 3.52 ± 1.92                 | 2.60 ± 1.89                     | 2.66 ± 1.35                | 1.77 ± 0.89                    |
| 32*†        | L olfactory sulcal fundus      | 3.84 ± 1.89                 | 2.58 ± 1.85                     | 3.06 ± 1.37                | 1.58 ± 0.83                    |
| <b>Mean</b> |                                | <b>4.15 ± 2.03</b>          | <b>3.34 ± 1.94</b>              | <b>3.69 ± 2.20</b>         | <b>2.82 ± 2.01</b>             |

Online Resource 3 – Mean real-world and consensus anatomical fiducial registration error (AFRE) with standard deviation obtained with linear and non-linear registration of clinical images to MNI space using fMRIPrep. Wilcoxon rank-sum tests were obtained for each anatomical fiducial (AFID) between linear and non-linear real-world AFRE, with a significance threshold of 0.05/32 (\*). Linear AFRE was significantly greater in 15 AFIDs. Wilcoxon rank-sum tests were obtained for each AFID between non-linear real-world and consensus AFRE, with a significance threshold of 0.05/32 (†). Real-world AFRE was significantly greater in 6 AFIDs. AC, anterior commissure; AL, anterolateral; AM, anteromedial; CC, corpus callosum; IPF, interpeduncular fossa; MB, mammillary body; LMS, lateral mesencephalic sulcus; LV, lateral ventricle; PC, posterior commissure; PMJ, pontomesencephalic junction.
