# Supplementary material for: Application of the anatomical fiducials framework to a clinical dataset of patients with Parkinson’s disease
Source: PubMed Central journal article supplement (PMC8741686; doi:10.1007/s00429-021-02408-3), 2021-10-23
Supplement: 429_2021_2408_MOESM4_ESM.pdf [file 429_2021_2408_MOESM4_ESM.pdf]

| <b>Fiducial 1</b>              | <b>Fiducial 2</b>              | <b>PD Distance</b> | <b>Oasis-1 Distance</b> | <b>Pairwise Difference</b> | <b>Percent Difference</b> |
|--------------------------------|--------------------------------|--------------------|-------------------------|----------------------------|---------------------------|
| L AL temporal horn             | L inferior AM temporal horn    | 9.6 ± 2.5          | 12.4 ± 1.7              | 2.82                       | 29.56                     |
| PMJ                            | Superior interpeduncular fossa | 9.3 ± 1.2          | 11.8 ± 1.3              | 2.48                       | 26.52                     |
| Infracollicular sulcus         | Pineal gland                   | 10.2 ± 1.1         | 12.1 ± 1.2              | 1.90                       | 18.70                     |
| PMJ                            | R inferior LMS                 | 14.8 ± 1.1         | 12.2 ± 1.0              | -2.56                      | -17.30                    |
| PMJ                            | L inferior LMS                 | 14.6 ± 1.0         | 12.2 ± 0.8              | -2.41                      | -16.44                    |
| PMJ                            | R MB                           | 13.4 ± 1.2         | 15.4 ± 1.4              | 2.01                       | 15.07                     |
| PMJ                            | L MB                           | 13.3 ± 1.2         | 15.2 ± 1.3              | 1.98                       | 14.96                     |
| L superior LMS                 | L indusium griseum origin      | 17.2 ± 1.9         | 19.5 ± 2.3              | 2.33                       | 13.52                     |
| R inferior AM temporal horn    | L inferior AM temporal horn    | 46.7 ± 3.7         | 40.7 ± 4.3              | -6.02                      | -12.88                    |
| PMJ                            | Intermammillary sulcus         | 13.0 ± 1.2         | 14.6 ± 1.4              | 1.51                       | 11.56                     |
| Intermammillary sulcus         | L inferior AM temporal horn    | 27.2 ± 2.2         | 24.0 ± 2.7              | -3.12                      | -11.48                    |
| R superior LMS                 | R indusium griseum origin      | 16.6 ± 1.9         | 18.5 ± 1.7              | 1.86                       | 11.16                     |
| L superior AM temporal horn    | R inferior AM temporal horn    | 45.2 ± 3.2         | 40.3 ± 3.6              | -4.90                      | -10.84                    |
| R superior AM temporal horn    | L inferior AM temporal horn    | 44.6 ± 3.1         | 39.8 ± 4.0              | -4.74                      | -10.63                    |
| L inferior LMS                 | L superior AM temporal horn    | 22.3 ± 1.8         | 19.9 ± 2.0              | -2.32                      | -10.42                    |
| R inferior AM temporal horn    | L olfactory sulcal fundus      | 44.7 ± 2.5         | 40.1 ± 2.6              | -4.62                      | -10.35                    |
| L MB                           | L inferior AM temporal horn    | 25.2 ± 2.1         | 22.6 ± 2.4              | -2.60                      | -10.31                    |
| Intermammillary sulcus         | R inferior AM temporal horn    | 27.0 ± 2.4         | 24.3 ± 2.5              | -2.69                      | -9.98                     |
| L inferior AM temporal horn    | L olfactory sulcal fundus      | 28.5 ± 2.1         | 25.6 ± 2.3              | -2.84                      | -9.98                     |
| R inferior AM temporal horn    | R olfactory sulcal fundus      | 29.1 ± 1.8         | 26.3 ± 2.3              | -2.83                      | -9.70                     |
| AC                             | L inferior AM temporal horn    | 32.7 ± 2.1         | 29.7 ± 2.4              | -3.01                      | -9.20                     |
| Infracollicular sulcus         | R superior LMS                 | 14.5 ± 0.9         | 15.9 ± 0.9              | 1.34                       | 9.20                      |
| AC                             | R inferior AM temporal horn    | 32.5 ± 2.3         | 29.6 ± 2.3              | -2.94                      | -9.05                     |
| R inferior LMS                 | L superior AM temporal horn    | 37.1 ± 2.3         | 33.8 ± 2.5              | -3.27                      | -8.82                     |
| L inferior AM temporal horn    | R olfactory sulcal fundus      | 44.5 ± 2.7         | 40.7 ± 3.1              | -3.83                      | -8.60                     |
| L inferior LMS                 | Intermammillary sulcus         | 25.2 ± 1.5         | 23.2 ± 1.4              | -2.03                      | -8.03                     |
| R superior AM temporal horn    | L olfactory sulcal fundus      | 42.6 ± 2.4         | 39.3 ± 2.7              | -3.30                      | -7.73                     |
| R inferior LMS                 | Intermammillary sulcus         | 25.3 ± 1.6         | 23.3 ± 1.7              | -1.95                      | -7.69                     |
| R inferior LMS                 | L inferior AM temporal horn    | 42.7 ± 2.6         | 39.4 ± 2.5              | -3.28                      | -7.67                     |
| AC                             | L olfactory sulcal fundus      | 20.8 ± 1.2         | 19.3 ± 1.3              | -1.47                      | -7.10                     |
| L inferior LMS                 | L MB                           | 24.3 ± 1.5         | 22.7 ± 1.3              | -1.65                      | -6.79                     |
| Superior interpeduncular fossa | L olfactory sulcal fundus      | 34.1 ± 1.8         | 31.8 ± 2.1              | -2.30                      | -6.76                     |
| L inferior LMS                 | L olfactory sulcal fundus      | 47.6 ± 2.6         | 44.4 ± 2.8              | -3.17                      | -6.66                     |
| R superior LMS                 | L inferior AM temporal horn    | 44.1 ± 2.8         | 41.3 ± 2.5              | -2.84                      | -6.44                     |
| R inferior LMS                 | L olfactory sulcal fundus      | 53.2 ± 2.6         | 49.9 ± 2.5              | -3.33                      | -6.26                     |
| R superior LMS                 | L olfactory sulcal fundus      | 50.2 ± 2.5         | 47.1 ± 2.3              | -3.13                      | -6.23                     |
| R inferior LMS                 | L MB                           | 26.4 ± 1.6         | 24.8 ± 1.6              | -1.59                      | -6.03                     |
| AC                             | R superior LMS                 | 32.0 ± 1.9         | 30.1 ± 1.2              | -1.90                      | -5.95                     |
| AC                             | L inferior LMS                 | 37.3 ± 2.0         | 35.1 ± 1.8              | -2.20                      | -5.89                     |
| AC                             | R inferior LMS                 | 37.4 ± 2.1         | 35.3 ± 1.9              | -2.05                      | -5.49                     |

Online Resource 4 - List of all mean pairwise distances (mm) ± standard deviation that are significantly different between OASIS-1 subjects and Parkinson's disease patients. Significance is determined by Wilcoxon rank-sum tests with Bonferroni correction, significance threshold of 0.05/496. AC, anterior commissure; AL, anterolateral; AM, anteromedial; CC, corpus callosum; IPF, interpeduncular fossa; MB, mammillary body; LMS, lateral mesencephalic sulcus; LV, lateral ventricle; PC, posterior commissure; PMJ, pontomesencephalic junction.
